# Supplementary material for: An Evaluation of the Healthiness of the Indian Packaged Food and Beverage Supply
Source: MDPI journal article supplement (doi:10.3390/nu9101103), 2017-10-09
Supplement: s1 [file s1]

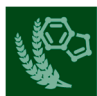

**Supplementary Figure S1.** Ranking of companies by a) mean Health Star Rating (HSR), b) proportion of healthy products (HSR $\geq$ 3.5) and c) proportion of products eligible for marketing to children (all without sales-value-weighting).

**a) mean HSR**

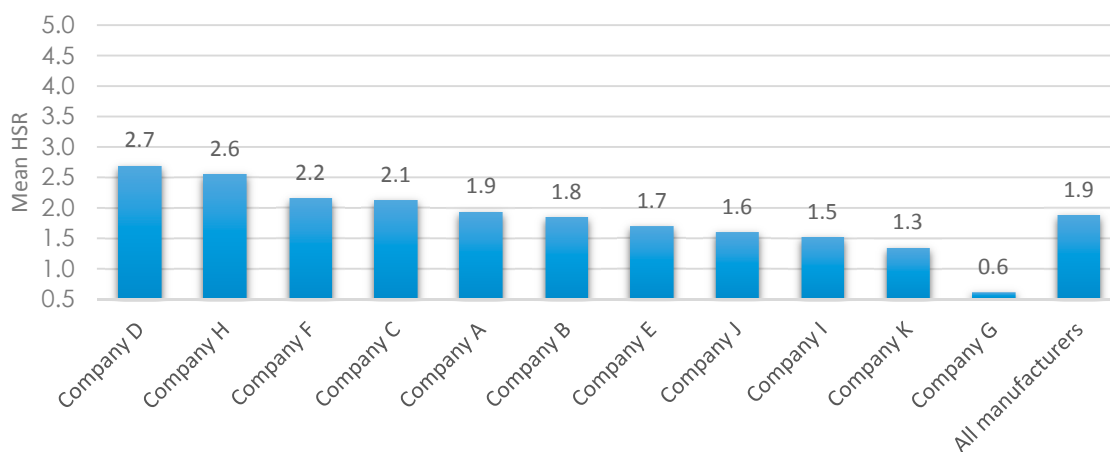

**b) proportion of healthy products (HSR $\geq$ 3.5)**

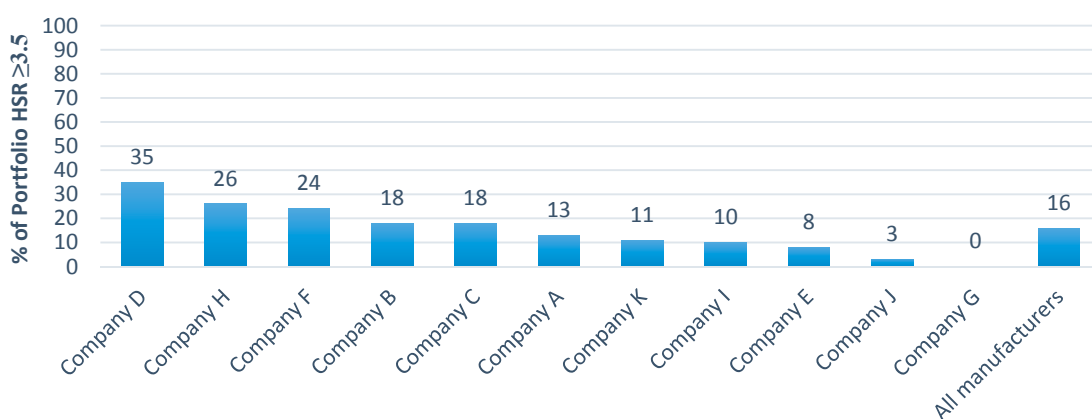

**c) proportion of products eligible for marketing to children**

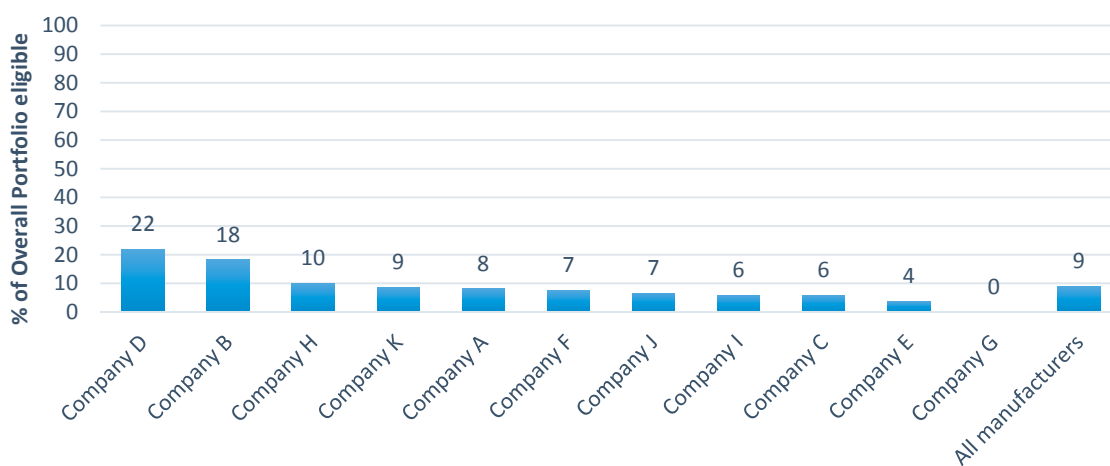

**Supplementary Table S1.** Product categorization—Euromonitor sub-categories and equivalent HSR and WHO Euro categories by category number and description\*.

Numbers accompanying categories correspond to numeric codes assigned within each model's published guidance materials [9, 12].

| Euromonitor Sub-category      | HSR Category                         | WHO Euro category                                                                                                                                      |
|-------------------------------|--------------------------------------|--------------------------------------------------------------------------------------------------------------------------------------------------------|
| Bread                         | 2 (Non-Dairy foods)                  | 11 (Bread, bread products and crisp breads)                                                                                                            |
| Cake                          | 2 (Non-Dairy foods)                  | 2 (Cakes, sweet biscuits and pastries; other sweet bakery wares, and dry mixes for making such)                                                        |
| Savory biscuits               | 2 (Non-Dairy foods)                  | 3 (Savory snacks)                                                                                                                                      |
| Sweet biscuits                | 2 (Non-Dairy foods)                  | 2 (Cakes, sweet biscuits and pastries; other sweet bakery wares, and dry mixes for making such)                                                        |
| Snack bars                    | 2 (Non-Dairy foods)                  | 1 (Chocolate and sugar confectionery, energy bars, and sweet toppings and desserts)                                                                    |
| Breakfast cereals             | 2 (Non-Dairy foods)                  | 6 (Breakfast cereals)                                                                                                                                  |
| Confectionery                 | 2 (Non-Dairy foods)                  | 1 (Chocolate and sugar confectionery, energy bars, and sweet toppings and desserts)                                                                    |
| Cheese                        | 3D (Cheese)**<br>2 (Non-Dairy foods) | 8 (Cheese)                                                                                                                                             |
| Ice cream and frozen desserts | 2 (Non-Dairy foods)***               | 5 (Edible ices)                                                                                                                                        |
| Fats and oils                 | 3 (Oils and spreads)                 | 10 (Butter and other fats and oils)                                                                                                                    |
| Processed fruit and veg       | 2 (Non-Dairy foods)                  | 16 (Processed fruit, vegetables and legumes)                                                                                                           |
| Ready meals                   | 2 (Non-Dairy foods)                  | 9 (Ready-made and convenience foods and composite dishes)                                                                                              |
| Rice, pasta and noodles       | 2 (Non-Dairy foods)                  | 12 (Fresh or dried pasta, rice and grains)                                                                                                             |
| Cooking sauces                | 2 (Non-Dairy foods)                  | 17 (Sauces, dips and dressings)                                                                                                                        |
| Table sauces                  | 2 (Non-Dairy foods)                  | 17 (Sauces, dips and dressings)                                                                                                                        |
| Soup                          | 2 (Non-Dairy foods)                  | 9 (Ready-made and convenience foods and composite dishes)                                                                                              |
| Spreads                       | 2 (Non-Dairy foods)                  | Nut spreads: 1 (Chocolate and sugar confectionery, energy bars, and sweet toppings and desserts)<br>Jams: 16 (Processed fruit, vegetables and legumes) |
| Savory snacks                 | 2 (Non-Dairy foods)                  | 3 (Savory snacks)                                                                                                                                      |
| Drinking milk products        | 1D (Dairy Beverages)                 | 4b (Milk drinks)                                                                                                                                       |
| Condensed milk                | 1D (Dairy Beverages)                 | 4b (Milk drinks)                                                                                                                                       |
| Dairy Whiteners               | 1D (Dairy Beverages)                 | 4b (Milk drinks)                                                                                                                                       |
| Yoghurt and sour milk         | 2D (Dairy Foods)                     | 7 (Yoghurts, sour milk, cream and other similar foods)                                                                                                 |
| Hot beverages                 | 1 (Non-Dairy Beverage)               | N/A                                                                                                                                                    |
| Regular cola carbonates       | 1 (Non-Dairy Beverage)               | 4d (Other beverages)                                                                                                                                   |
| Low calorie cola carbonates   | 1 (Non-Dairy Beverage)               | 4d (Other beverages)                                                                                                                                   |
| Lemonade/lime carbonates      | 1 (Non-Dairy Beverage)               | 4d (Other beverages)                                                                                                                                   |

|                           |                        |                      |
|---------------------------|------------------------|----------------------|
| Orange carbonates         | 1 (Non-Dairy Beverage) | 4d (Other beverages) |
| Mixers                    | 1 (Non-Dairy Beverage) | 4d (Other beverages) |
| Other non-cola carbonates | 1 (Non-Dairy Beverage) | 4d (Other beverages) |
| Nectars                   | 1 (Non-Dairy Beverage) | 4a (Juices)          |
| Juice drinks              | 1 (Non-Dairy Beverage) | 4a (Juices)          |
| Flavored bottled water    | 1 (Non-Dairy Beverage) | 4d (Other beverages) |
| Sports drinks             | 1 (Non-Dairy Beverage) | 4d (Other beverages) |
| Energy drinks             | 1 (Non-Dairy Beverage) | 4c (Energy drinks)   |
| Liquid concentrates       | 1 (Non-Dairy Beverage) | 4d (Other beverages) |
| Powder concentrates       | 1 (Non-Dairy Beverage) | 4d (Other beverages) |
| Ready-to-drink (RTD) tea  | 1 (Non-Dairy Beverage) | 4d (Other beverages) |
| Fruit-flavored drinks     | 1 (Non-Dairy Beverage) | 4d (Other beverages) |

\* For detailed definitions see: Euromonitor sub-categories <http://www.euromonitor.com/about-us>; HSR categories, HSR Guide for Industry (link below); WHO Euro categories, p 5-6 of guidance materials at [http://www.euro.who.int/\\_\\_data/assets/pdf\\_file/0005/270716/Europe-nutrient-profile-model-2015-en.pdf?ua=1](http://www.euro.who.int/__data/assets/pdf_file/0005/270716/Europe-nutrient-profile-model-2015-en.pdf?ua=1)

\*\* Defined for the purposes of HSR as cheeses with calcium content  $\geq 320\text{mg}/100\text{g}$ . Where insufficient calcium content, product classified in Category 2 foods.

\*\*\* Custards, desserts, cream cheese, ice-cream and cream are not considered as dairy foods but are classified as Category 2 foods for the purpose of HSR. For further explanation see the HSR Guide for Industry <http://healthstarrating.gov.au/internet/healthstarrating/publishing.nsf/Content/guide-for-industry-document>

**Supplementary Table S2.** Alignment of nutrients required for profiling models with those required by Indian labelling legislation.

|                                                   | Indian Regulations | HSR | WHO Euro |
|---------------------------------------------------|--------------------|-----|----------|
| Total number of nutrients required                | 5                  | 8   | 5        |
| Protein                                           | ✓                  | ✓   |          |
| Fiber                                             |                    | ✓   |          |
| Fruit and vegetable content                       |                    | ✓   |          |
| Energy                                            | ✓                  | ✓   | ✓        |
| Total fat                                         | ✓                  |     | ✓        |
| Saturated fat                                     |                    | ✓   | ✓        |
| Trans fat                                         |                    |     | ✓        |
| Carbohydrate                                      | ✓                  |     |          |
| Total sugars                                      | ✓                  | ✓   | ✓        |
| Added sugars                                      |                    |     | ✓        |
| Other sweeteners                                  |                    |     | ✓        |
| Sodium                                            |                    | ✓   | ✓        |
| Calcium                                           |                    | ✓   |          |
| Number of nutrients aligned to Indian legislation |                    | 3/5 | 3/5      |

**Supplementary Table S3.** Number of food and beverage products by company in Euromonitor sub-categories.

| EUROMONITOR SUBCATEGORY |                                | Company A | Company B | Company C | Company D | Company E | Company F | Company G | Company H | Company I | Company J | Company K | Total |
|-------------------------|--------------------------------|-----------|-----------|-----------|-----------|-----------|-----------|-----------|-----------|-----------|-----------|-----------|-------|
| FOODS                   | Bread                          | 7         | 0         | 0         | 0         | 0         | 0         | 0         | 0         | 0         | 0         | 0         | 7     |
|                         | Cake                           | 12        | 0         | 0         | 0         | 0         | 0         | 0         | 0         | 0         | 0         | 0         | 12    |
|                         | Dessert mixes                  | 0         | 0         | 0         | 0         | 2         | 0         | 0         | 0         | 0         | 0         | 0         | 2     |
|                         | Savory biscuits                | 8         | 0         | 0         | 0         | 3         | 0         | 0         | 0         | 0         | 10        | 0         | 21*   |
|                         | Sweet biscuits                 | 46        | 0         | 0         | 0         | 29        | 1         | 7         | 0         | 1         | 45        | 0         | 128*  |
|                         | Breakfast cereals              | 0         | 0         | 0         | 2         | 1         | 0         | 0         | 0         | 2         | 0         | 14        | 19*   |
|                         | Confectionery                  | 0         | 0         | 3         | 0         | 4         | 0         | 29        | 0         | 13        | 12        | 0         | 61*   |
|                         | Cheese                         | 7         | 0         | 9         | 0         | 0         | 1         | 0         | 4         | 0         | 0         | 0         | 21*   |
|                         | Drinking milk products         | 3         | 2         | 19        | 0         | 0         | 17        | 0         | 16        | 4         | 0         | 0         | 62*   |
|                         | Yoghurt and sour milk          | 3         | 0         | 5         | 0         | 0         | 3         | 0         | 14        | 8         | 0         | 0         | 33*   |
|                         | Ice cream and frozen desserts  | 0         | 0         | 41        | 34        | 0         | 27        | 0         | 56        | 0         | 0         | 0         | 157*  |
|                         | Fats and oils                  | 1         | 0         | 5         | 0         | 1         | 4         | 0         | 7         | 0         | 0         | 0         | 18*   |
|                         | Processed fruit and vegetables | 0         | 0         | 0         | 0         | 5         | 0         | 0         | 3         | 0         | 0         | 0         | 8     |
|                         | Ready meals                    | 0         | 0         | 1         | 0         | 17        | 0         | 0         | 1         | 3         | 0         | 0         | 22    |
|                         | Rice, pasta and noodles        | 0         | 0         | 0         | 5         | 9         | 0         | 0         | 0         | 7         | 0         | 0         | 21*   |
|                         | Cooking sauces                 | 0         | 0         | 0         | 17        | 9         | 0         | 0         | 0         | 6         | 0         | 0         | 32*   |
|                         | Table sauces                   | 0         | 0         | 0         | 8         | 5         | 0         | 0         | 7         | 4         | 0         | 0         | 24*   |
|                         | Soup                           | 0         | 0         | 0         | 19        | 0         | 0         | 0         | 0         | 0         | 0         | 0         | 19    |
|                         | Spreads                        | 0         | 0         | 0         | 7         | 1         | 0         | 0         | 4         | 0         | 0         | 0         | 12    |
|                         | Savory snacks                  | 0         | 0         | 0         | 0         | 19        | 0         | 0         | 0         | 0         | 9         | 92        | 120*  |
|                         | Other dairy products           | 0         | 0         | 1         | 0         | 0         | 0         | 0         | 2         | 1         | 0         | 0         | 4     |
| BEVERAGES               | Whitener                       | 0         | 1         | 2         | 0         | 0         | 1         | 0         | 1         | 3         | 0         | 0         | 8     |
|                         | Condensed milk                 | 0         | 0         | 1         | 0         | 0         | 0         | 0         | 0         | 2         | 0         | 0         | 3     |
|                         | Regular cola carbonates        | 0         | 2         | 0         | 0         | 0         | 0         | 0         | 0         | 0         | 0         | 1         | 3     |
|                         | Low calorie cola carbonates    | 0         | 2         | 0         | 0         | 0         | 0         | 0         | 0         | 0         | 0         | 1         | 3     |
|                         | Lemonade/lime carbonates       | 0         | 4         | 0         | 0         | 0         | 0         | 0         | 0         | 0         | 0         | 2         | 6     |
|                         | Orange carbonates              | 0         | 1         | 0         | 0         | 0         | 0         | 0         | 0         | 0         | 0         | 1         | 2     |
|                         | Mixers                         | 0         | 5         | 0         | 0         | 0         | 0         | 0         | 0         | 0         | 0         | 2         | 7     |
|                         | Other non-cola carbonates      | 0         | 3         | 0         | 0         | 0         | 0         | 0         | 0         | 0         | 0         | 1         | 4     |
|                         | Nectars (25-99% juice)         | 0         | 1         | 0         | 6         | 3         | 0         | 0         | 0         | 0         | 0         | 0         | 10    |
|                         | Low calorie cola carbonates    | 0         | 2         | 0         | 0         | 0         | 0         | 0         | 0         | 0         | 0         | 1         | 3     |
|                         | Juice drinks (up to 24% juice) | 0         | 7         | 0         | 0         | 5         | 0         | 0         | 7         | 0         | 0         | 19        | 38*   |
|                         | Still bottled water            | 0         | 2         | 0         | 0         | 0         | 0         | 0         | 0         | 0         | 0         | 1         | 3     |
|                         | Sports drinks                  | 0         | 0         | 0         | 0         | 0         | 0         | 0         | 0         | 0         | 0         | 3         | 3     |
|                         | Liquid concentrates            | 0         | 0         | 0         | 1         | 0         | 0         | 0         | 0         | 2         | 0         | 0         | 3     |
|                         | Powder concentrates            | 0         | 0         | 0         | 2         | 0         | 0         | 7         | 0         | 4         | 0         | 2         | 15    |
|                         | Ready-to-drink tea             | 0         | 2         | 0         | 1         | 0         | 0         | 0         | 0         | 0         | 0         | 2         | 5     |
|                         | Hot beverages                  | 0         | 1         | 1         | 8         | 0         | 0         | 5         | 0         | 12        | 0         | 0         | 27*   |
|                         | SUBTOTAL FOOD                  | 87        | 3         | 87        | 92        | 105       | 54        | 36        | 115       | 53        | 76        | 106       | 814   |
|                         | SUBTOTAL BEVERAGE              | 0         | 30        | 1         | 18        | 8         | 0         | 12        | 7         | 18        | 0         | 35        | 129   |
|                         | TOTAL FOOD AND BEVERAGE        | 87        | 33        | 88        | 110       | 113       | 54        | 48        | 122       | 71        | 78        | 141       | 943   |

\*Shaded subcategories mark those with sufficient products (at least five products made by at least two companies) for sub-category analysis.

**Supplementary Table S4.** Distribution of Health Star Rating (HSR) by company.

|                       | Health Star Rating |       |       |       |      |      |      |      |      |      | Total |
|-----------------------|--------------------|-------|-------|-------|------|------|------|------|------|------|-------|
|                       | 0.5                | 1     | 1.5   | 2     | 2.5  | 3    | 3.5  | 4    | 4.5  | 5    |       |
| Company A             | 11                 | 8     | 23    | 23    | 2    | 9    | 4    | 6    | 1    | 0    | 87    |
| Company B             | 6                  | 11    | 5     | 4     | 0    | 1    | 1    | 0    | 0    | 5    | 33    |
| Company C             | 12                 | 10    | 8     | 19    | 15   | 6    | 5    | 8    | 1    | 1    | 85    |
| Company D             | 4                  | 12    | 8     | 12    | 7    | 24   | 13   | 23   | 0    | 0    | 103   |
| Company E             | 17                 | 23    | 26    | 17    | 13   | 5    | 4    | 5    | 0    | 0    | 110   |
| Company F             | 8                  | 8     | 11    | 3     | 4    | 4    | 0    | 7    | 4    | 1    | 50    |
| Company G             | 41                 | 2     | 2     | 0     | 1    | 0    | 0    | 0    | 0    | 0    | 46    |
| Company H             | 4                  | 7     | 23    | 27    | 20   | 8    | 7    | 8    | 12   | 4    | 120   |
| Company I             | 35                 | 3     | 5     | 5     | 4    | 9    | 1    | 4    | 2    | 0    | 68    |
| Company J             | 14                 | 12    | 26    | 5     | 8    | 8    | 1    | 1    | 0    | 0    | 75    |
| Company K             | 70                 | 20    | 20    | 8     | 4    | 4    | 1    | 3    | 7    | 4    | 141   |
| Total no. of products | 222                | 116   | 157   | 123   | 78   | 78   | 37   | 65   | 27   | 15   | 918   |
| % of total products   | 24.2%              | 12.5% | 17.1% | 13.4% | 8.5% | 8.5% | 4.0% | 7.1% | 2.9% | 1.8% | 100%  |

**Supplementary Table S5.** Mean and range Health Star Rating (HSR) of products by Euromonitor sub-category, all manufacturers

| Euromonitor Subset |                                | Mean HSR | Range HSR  |
|--------------------|--------------------------------|----------|------------|
| FOODS              | Bread                          | 3.8      | 3.5 to 4.0 |
|                    | Cake                           | 1.4      | 0.5 to 2.0 |
|                    | Dessert mixes                  | 2.3      | 2.0 to 2.5 |
|                    | Savory biscuits                | 2.0      | 1.5 to 3.0 |
|                    | Sweet biscuits                 | 1.5      | 0.5 to 4.0 |
|                    | Breakfast cereals              | 3.1      | 0.5 to 5.0 |
|                    | Confectionery                  | 0.7      | 0.5 to 3.0 |
|                    | Cheese                         | 2.8      | 0.5 to 5.0 |
|                    | Drinking milk products         | 2.8      | 0.5 to 5.0 |
|                    | Yoghurt and sour milk          | 3.5      | 2.0 to 4.5 |
|                    | Ice cream and frozen desserts  | 2.0      | 0.5 to 4.0 |
|                    | Fats and oils                  | 1.2      | 0.5 to 4.5 |
|                    | Processed fruit and vegetables | 4.0      | 2.5 to 5.0 |
|                    | Ready meals                    | 1.5      | 1.0 to 4.0 |
|                    | Rice, pasta and noodles        | 2.5      | 0.5 to 4.0 |
|                    | Cooking sauces                 | 2.5      | 0.5 to 4.5 |
|                    | Table sauces                   | 2.8      | 1.5 to 4.5 |
|                    | Soup                           | 3.8      | 0.5 to 4.0 |
|                    | Spreads                        | 2.0      | 1.5 to 3.5 |
|                    | Savory snacks                  | 1.3      | 0.5 to 4.5 |
| BEVERAGES          | Other dairy                    | 1.3      | 0.5 to 1.5 |
|                    | Whitener                       | 1.2      | 0.5 to 3.5 |
|                    | Condensed milk                 | 1.3      | 0.5 to 3.0 |
|                    | Regular cola carbonates        | 1.0      | 1.0        |
|                    | Low calorie cola carbonates    | 2.0      | 2.0        |
|                    | Lemonade/lime carbonates       | 1.2      | 1.0 to 2.0 |
|                    | Orange carbonates              | 0.8      | 0.5 to 1.0 |
|                    | Mixers                         | 4.0      | 1.0 to 5.0 |
|                    | Other non-cola carbonates      | 0.9      | 0.5 to 1.0 |
|                    | Nectars (25-99% juice)         | 1.0      | 0.5 to 2.0 |
|                    | Juice drinks (up to 24% juice) | 0.9      | 0.5 to 2.0 |
|                    | Still bottled water            | 5.0      | 5.0        |
|                    | Sports drinks                  | 1.5      | 1.5        |
|                    | Liquid concentrates            | 0.5      | 0.5        |
|                    | Powder concentrates            | 0.7      | 0.5 to 1.5 |
|                    | Ready-to-drink tea             | 1.4      | 1.0 to 2.0 |
|                    | Hot beverages                  | 0.7      | 0.5 to 4.0 |
